# Supplementary material for: Nick Hornby y el cine
Source: Springer Nature journal article supplement (doi:10.1007/s00125-009-1622-2), 2005-01-01
Supplement: MOESM1 [file 8088924]

## **Electronic supplementary material**

The Japan Diabetes Complications Study (JDCCS) Group (including current and former members with their affiliations at the time of their participation in this study):

Primary investigator: N. Yamada (University of Tsukuba)

Chief of Assessment Committee: Y. Akanuma (Institute for Adult Diseases, Asahi Life Foundation)

Secretary-general: H. Sone (University of Tsukuba)

K. Ato, M. Eto, H. Ito (Asahikawa Medical College); N. Hashimoto, A. Kanatsuka, Y. Saito, K. Sakurai, K. Takahashi, K. Yagi, K. Yokote (Chiba University); T. Takekoshi, T. Wakasugi (Fukui Prefectural Hospital); S. Toyooka (Fukui Red Cross Hospital); Y. Bando (Fukui Saiseikai Hospital); T. Nakai, K. Oida, J. Suzuki (Fukui University); Y. Fukumoto, S. Sumi (Garatia Hospital); T. Awaya, G. Egusa, R. Fujikawa, M. Okubo, K. Yamane (Hiroshima University); T. Koike, N. Yoshioka (Hokkaido University); Y. Akanuma, M. Anai, R. Honda, M. Kikuchi (Institute for Adult Diseases, Asahi Life Foundation); S. Ishibashi (Jichi Medical School); M. Kawakami, K. Namai, H. Tamemoto, H. Toyoshima (Jichi Medical School, Saitama Medical Center); M. Nemoto, T. Sasaki (Jikei University); R. Kawamori, Y. Tanaka (Juntendo University); T. Ishida (Kagawa University); T. Kawai, I. Takei (Keio University); Y. Fujita, K. Tanaka, Y. Yajima (Kitazato University); H. Kishikawa, T. Toyonaga, K. Tsuruzoe (Kumamoto University); Y. Imamura, S. Komichi, Z. Makita, K. Nonaka, K. Yamada (Kurume University); N. Nakamura, K. Nakano (Kyoto Prefectural University of Medicine); T. Iguchi, H. Nawata (Kyushu University); Y. Matsushima (Matsudo City Hospital); H. Takahashi (Minami Akatsuka Clinic); H. Toyoshima (Minoh City Hospital); S. Akazawa, E. Kawasaki, S. Nagataki (Nagasaki University); T. Hayashi, N. Hotta,

J. Nakamura (Nagoya University); K. Doi, Y. Harano, H. Makino, Y. Yoshimasa (National Cardiovascular Center); Y. Hayashi (Nihon University); S. Oikawa (Nippon Medical School); R. Abe (Ohta Memorial Hospital); H. Seino, S. Suzuki, D. Yamada (Ohta-Nishinouchi Hospital); M. Hoshi, E. Imano, T. Watarai (Osaka Koseinenkin Hospital); M. Imaizumi, R. Todo (Osaka National Hospital); K. Kosugi, Y. Shimizu, Y. Umayahara (Osaka Police Hospital); M. Matsuhisa, J. Miyagawa, M. Nanba, K. Okita, K. Takemura, Y. Yamasaki (Osaka University); Y. Atsumi, K. Hosokawa, K. Matsuoka (Saiseikai Central Hospital); J. Nakano, H. Umezu (Saiseikai Fukushima General Hospital); A. Hoshino, T. Nishiyama, T. Nogami (Saiseikai Kumamoto Hospital); H. Nunome (Saiseikai Mito Hospital); S. Katayama, S. Kurihara, A. Togashi (Saitama Medical College); K. Yamada (Sakura National Hospital); S. Araki, A. Kashiwagi, Y. Nishio (Shiga University of Medical Science); Y. Yoshimura (Shikoku University); T. Inoue (Shizuoka General Hospital); M. Kitaoka (Showa General Hospital); T. Kitada, A. Shirai, R. Watanabe (Takeda General Hospital); T. Miyagawa (Tama Minami Clinic); O. Mokuta, R. Okazaki, Y. Sakamoto (Teikyo University Ichihara Hospital); Y. Ishigaki, K. Takahashi (Tohoku University); Y. Miyashita, K. Shirai (Toho University Sakura Hospital); A. Tanaka (Tokyo Medical and Dental University); Y. Fujita (Tokyo Metropolitan Institute of Gerontology); H. Ito (Tokyo Metropolitan Geriatric Hospital); Y. Iwamoto, R. Kawahara, Y. Omori, A. Sato (Tokyo Women's Medical University); Y. Mori, T. Murase, M. Noda, M. Odawara (Toranomon Hospital); M. Kobayashi, M. Urakaze (Toyama University); R. Aida, H. Fujii, S. Iimuro, T. Kadowaki, Y. Ohashi, J. Osuga, Y. Ouchi, A. Takahashi, S. Tanaka, S. Tanaka (University of Tokyo); H. Sone, N. Yamada, K. Yamashita (University of Tsukuba); R. Kawasaki, H. Yamashita (Yamagata University); H. Sekihara, Y. Terauchi (Yokohama City University); T. Nishikawa (Yokohama Rosai Hospital); H. Furuta, K. Nanjo (Wakayama Medical University).
